# Supplementary material
Source: publisher figshare collection journal article supplement (https://aacr.figshare.com/articles/dataset/_/22439388)
Supplement: Supplementary file 1 [file 39890223]

**Table 4 (supplemental data). Main indices of *EGFR* gene copy number in tumor areas used for analysis of the variability of gene copy number within individual tumor samples**

| Sample      | Mean | SD   | Median | Min  | Max  | Number of tumor areas analyzed |
|-------------|------|------|--------|------|------|--------------------------------|
| 505008i     | 2.74 | 0.00 | 2.74   | 2.74 | 2.74 | 2                              |
| 00L-27072   | 3.63 | 0.32 | 3.60   | 3.33 | 3.96 | 3                              |
| 01.1239.1   | 2.93 | 0.06 | 2.90   | 2.89 | 3.00 | 3                              |
| 028.7785.3A | 2.86 | 0.06 | 2.89   | 2.80 | 2.90 | 3                              |
| 02B8919.3C  | 2.40 | 0.18 | 2.35   | 2.25 | 2.60 | 3                              |
| 04.1113.5   | 1.63 | 0.03 | 1.64   | 1.60 | 1.66 | 3                              |
| 1303540.5   | 1.38 | 0.14 | 1.34   | 1.25 | 1.53 | 3                              |
| 137R71C     | 3.23 | 0.25 | 3.35   | 2.95 | 3.40 | 3                              |
| 722474.5.B2 | 2.51 | 0.07 | 2.52   | 2.44 | 2.58 | 3                              |
| 01W1977-2   | 2.34 | 0.17 | 2.33   | 2.16 | 2.56 | 4                              |
| 02-8462-B4  | 2.63 | 0.17 | 2.60   | 2.45 | 2.85 | 4                              |
| 03275374    | 3.21 | 0.34 | 3.18   | 2.84 | 3.64 | 4                              |
| 667330.5    | 3.18 | 0.14 | 3.20   | 3.00 | 3.32 | 4                              |
| 710248      | 2.54 | 0.22 | 2.60   | 2.24 | 2.73 | 4                              |
| 566903B3    | 3.19 | 0.59 | 3.26   | 2.55 | 3.95 | 5                              |
| 566903B4    | 2.93 | 0.58 | 3.15   | 2.25 | 3.60 | 5                              |
| 566903B5    | 3.75 | 0.14 | 3.75   | 3.55 | 3.95 | 5                              |
| 660024.3    | 2.64 | 0.15 | 2.65   | 2.40 | 2.78 | 5                              |
| 674072.4    | 3.41 | 0.21 | 3.35   | 3.14 | 3.65 | 5                              |
| H2O 4249.4  | 3.07 | 0.54 | 3.20   | 2.46 | 3.75 | 5                              |
| 02.2553.I   | 2.50 | 0.26 | 2.60   | 2.15 | 2.76 | 6                              |
| 02P11543B9  | 3.64 | 0.33 | 3.48   | 3.35 | 4.10 | 6                              |
| 1004578.6   | 2.76 | 0.18 | 2.78   | 2.50 | 3.02 | 6                              |
| 1100501.8   | 2.84 | 0.15 | 2.82   | 2.63 | 3.02 | 6                              |
| 17956.04A   | 2.89 | 0.16 | 2.88   | 2.70 | 3.11 | 6                              |
| 98B3002.3   | 2.60 | 0.29 | 2.50   | 2.26 | 3.00 | 6                              |
| 01-2296B2   | 2.78 | 0.32 | 2.73   | 2.40 | 3.24 | 8                              |

SD: standard deviation; Min = lowest mean gene copy number observed in a single area; Max = highest mean gene copy number observed in a single area.

**Table 5 (supplemental data). Main indices of *EGFR* gene copy number in tumor samples used for analysis of the variability of gene copy number within individual patients**

| Patient | Mean | SD   | Median | Min  | Max  | Number of available blocks | Tumor sites analyzed              |
|---------|------|------|--------|------|------|----------------------------|-----------------------------------|
| 2       | 2.94 | 0.55 | 2.94   | 2.56 | 3.33 | 2                          | Primary/metastasis                |
| 15      | 3.07 | 0.65 | 3.07   | 2.61 | 3.53 | 2                          | Primary/primary                   |
| 26      | 2.57 | 0.31 | 2.57   | 2.34 | 2.79 | 2                          | Primary/metastasis                |
| 28      | 3.02 | 0.32 | 3.02   | 2.80 | 3.25 | 2                          | Primary/metastasis                |
| 43      | 2.54 | 0.28 | 2.54   | 2.34 | 2.74 | 2                          | Primary/primary                   |
| 56      | 2.89 | 0.31 | 2.89   | 2.67 | 3.11 | 2                          | Primary/primary                   |
| 57      | 2.72 | 0.13 | 2.72   | 2.63 | 2.82 | 2                          | Primary/primary                   |
| 58      | 2.24 | 0.02 | 2.24   | 2.22 | 2.25 | 2                          | Primary/primary                   |
| 59      | 1.82 | 0.01 | 1.82   | 1.81 | 1.83 | 2                          | Metastasis/metastasis             |
| 69      | 3.47 | 0.27 | 3.47   | 3.28 | 3.67 | 2                          | Primary/metastasis                |
| 72      | 2.64 | 0.36 | 2.64   | 2.38 | 2.90 | 2                          | Metastasis/metastasis             |
| 13      | 3.13 | 0.80 | 2.78   | 2.56 | 4.04 | 3                          | Primary/primary/<br>metastasis    |
| 36      | 1.87 | 0.23 | 1.79   | 1.69 | 2.12 | 3                          | Primary/primary/<br>primary       |
| 41      | 1.85 | 0.11 | 1.91   | 1.72 | 1.91 | 3                          | Primary/primary/<br>primary       |
| 53      | 2.71 | 0.16 | 2.79   | 2.52 | 2.82 | 3                          | Primary/metastasis/<br>metastasis |
| 62      | 2.92 | 0.43 | 2.84   | 2.54 | 3.38 | 3                          | Primary/primary/<br>primary       |
| 236     | 3.29 | 0.42 | 3.19   | 2.93 | 3.75 | 3                          | Primary/primary/<br>primary       |

SD: standard deviation; Min = lowest mean gene copy number observed in a single tumor sample; Max = highest mean gene copy number observed in a single tumor sample.

**Table 6 (supplemental data). Results obtained using the dichotomisation: “is the percentage of cells, having a GCN higher than a specific value  $r$ , higher than some percentage value  $s$ ?” as a predictor for response. Listed are all dichotomisations yielding a c-index higher than 0.60**

|           | <b>c-index</b> | <b>GCN (= <math>r</math>)</b> | <b>Percent of cells (= <math>s</math>)</b> |
|-----------|----------------|-------------------------------|--------------------------------------------|
| <b>1</b>  | 0.718710       | 2                             | 56                                         |
| <b>2</b>  | 0.710645       | 2                             | 54                                         |
| <b>3</b>  | 0.710645       | 2                             | 55                                         |
| <b>4</b>  | 0.698710       | 2                             | 57                                         |
| <b>5</b>  | 0.698710       | 2                             | 58                                         |
| <b>6</b>  | 0.694516       | 2                             | 53                                         |
| <b>7</b>  | 0.686129       | 3                             | 15                                         |
| <b>8</b>  | 0.682581       | 3                             | 20                                         |
| <b>9</b>  | 0.682581       | 3                             | 21                                         |
| <b>10</b> | 0.682258       | 3                             | 17                                         |
| <b>11</b> | 0.678710       | 1                             | 91                                         |
| <b>12</b> | 0.674839       | 1                             | 92                                         |
| <b>13</b> | 0.674194       | 3                             | 16                                         |
| <b>14</b> | 0.670645       | 1                             | 90                                         |
| <b>15</b> | 0.670323       | 3                             | 18                                         |
| <b>16</b> | 0.670323       | 2                             | 52                                         |
| <b>17</b> | 0.666774       | 3                             | 22                                         |
| <b>18</b> | 0.662903       | 3                             | 23                                         |
| <b>19</b> | 0.662903       | 3                             | 24                                         |
| <b>20</b> | 0.662903       | 3                             | 25                                         |
| <b>21</b> | 0.662903       | 3                             | 26                                         |
| <b>22</b> | 0.662581       | 4                             | 5                                          |
| <b>23</b> | 0.662258       | 1                             | 88                                         |
| <b>24</b> | 0.661935       | 3                             | 14                                         |
| <b>25</b> | 0.661935       | 2                             | 40                                         |
| <b>26</b> | 0.661935       | 2                             | 41                                         |
| <b>27</b> | 0.661935       | 2                             | 42                                         |
| <b>28</b> | 0.661935       | 2                             | 43                                         |
| <b>29</b> | 0.661935       | 2                             | 44                                         |
| <b>30</b> | 0.659355       | 1                             | 96                                         |

|           | <b>c-index</b> | <b>GCN (= <i>r</i>)</b> | <b>Percent of cells (= <i>s</i>)</b> |
|-----------|----------------|-------------------------|--------------------------------------|
| <b>31</b> | 0.659032       | 1                       | 93                                   |
| <b>32</b> | 0.659032       | 1                       | 94                                   |
| <b>33</b> | 0.658387       | 3                       | 19                                   |
| <b>34</b> | 0.658065       | 2                       | 50                                   |
| <b>35</b> | 0.655484       | 4                       | 11                                   |
| <b>36</b> | 0.654839       | 2                       | 61                                   |
| <b>37</b> | 0.654194       | 2                       | 51                                   |
| <b>38</b> | 0.654194       | 1                       | 87                                   |
| <b>39</b> | 0.653871       | 2                       | 39                                   |
| <b>40</b> | 0.653548       | 1                       | 80                                   |
| <b>41</b> | 0.653226       | 3                       | 5                                    |
| <b>42</b> | 0.650968       | 2                       | 63                                   |
| <b>43</b> | 0.650968       | 2                       | 64                                   |
| <b>44</b> | 0.650968       | 2                       | 65                                   |
| <b>45</b> | 0.650968       | 2                       | 66                                   |

GCN: gene copy number.

**Table 7 (supplemental data). Diagnostic performances obtained with 56% of polysomic cells (best percentage of polysomic cells as indicated by receiver operating characteristic curve analysis) to predict objective response**

| <b>sensitivity</b> | <b>specificity</b> | <b>PPV</b> | <b>NPV</b> | <b>accuracy</b> | <b>AUC</b> |
|--------------------|--------------------|------------|------------|-----------------|------------|
| 0.72               | 0.74194            | 0.52941    | 0.86792    | 0.73563         | 0.73097    |

PPV, positive predictive value; NPV, negative predictive value; AUC, area under the curve.
